# Supplementary material for: Effect of Topical Administration of Fractions and Isolated Molecules from Plant Extracts on Skin Wound Healing: A Systematic Review of Murine Experimental Models
Source: PubMed Central journal article supplement (PMC5086515; doi:10.1155/2016/4916068), 2016-10-17
Supplement: 4916068.f1.pdf [file 4916068.f1.pdf]

**Table S1:** Full search strategy in PubMed and Scopus, including search terms and filters.

| Data base                  | Descriptors                                                                                                                                                                                                                                                                                                                                                                                                                                                                                                                                                                                                                                                                                                                                                                                                                                                                                                                                                                                                                                                                                                                                                                                                                                                                                                                                                                                                                                                                                                                                                                                                                                                                                                                                                                                                                                                                                                                                                                                                                                                                                                                                                                                                                                                                                                                                                                                                                                                                                                                                                                                                                                                                                                                                                                                                                                                                                                                                                                                                                                                                                                                                                                                                                                                                                                                                                                                                                                                                                                                                                                                                                                                                                                                                                                                                                                                                                                                                                                                                                                                                                                                                                                                                                                                                                                                                                                                                                                                                                                                                                                                                                                                                                                                                                                                                                                                                                                                                                                                                                                                                                                                                                                                                                                                                                                                                                                                                                                                                                                                                                                                                                                                                                                                                                                                                                                                                                                                                                                                             | Items Found | Time     | Date       |
|----------------------------|---------------------------------------------------------------------------------------------------------------------------------------------------------------------------------------------------------------------------------------------------------------------------------------------------------------------------------------------------------------------------------------------------------------------------------------------------------------------------------------------------------------------------------------------------------------------------------------------------------------------------------------------------------------------------------------------------------------------------------------------------------------------------------------------------------------------------------------------------------------------------------------------------------------------------------------------------------------------------------------------------------------------------------------------------------------------------------------------------------------------------------------------------------------------------------------------------------------------------------------------------------------------------------------------------------------------------------------------------------------------------------------------------------------------------------------------------------------------------------------------------------------------------------------------------------------------------------------------------------------------------------------------------------------------------------------------------------------------------------------------------------------------------------------------------------------------------------------------------------------------------------------------------------------------------------------------------------------------------------------------------------------------------------------------------------------------------------------------------------------------------------------------------------------------------------------------------------------------------------------------------------------------------------------------------------------------------------------------------------------------------------------------------------------------------------------------------------------------------------------------------------------------------------------------------------------------------------------------------------------------------------------------------------------------------------------------------------------------------------------------------------------------------------------------------------------------------------------------------------------------------------------------------------------------------------------------------------------------------------------------------------------------------------------------------------------------------------------------------------------------------------------------------------------------------------------------------------------------------------------------------------------------------------------------------------------------------------------------------------------------------------------------------------------------------------------------------------------------------------------------------------------------------------------------------------------------------------------------------------------------------------------------------------------------------------------------------------------------------------------------------------------------------------------------------------------------------------------------------------------------------------------------------------------------------------------------------------------------------------------------------------------------------------------------------------------------------------------------------------------------------------------------------------------------------------------------------------------------------------------------------------------------------------------------------------------------------------------------------------------------------------------------------------------------------------------------------------------------------------------------------------------------------------------------------------------------------------------------------------------------------------------------------------------------------------------------------------------------------------------------------------------------------------------------------------------------------------------------------------------------------------------------------------------------------------------------------------------------------------------------------------------------------------------------------------------------------------------------------------------------------------------------------------------------------------------------------------------------------------------------------------------------------------------------------------------------------------------------------------------------------------------------------------------------------------------------------------------------------------------------------------------------------------------------------------------------------------------------------------------------------------------------------------------------------------------------------------------------------------------------------------------------------------------------------------------------------------------------------------------------------------------------------------------------------------------------------------------------------------------------------------|-------------|----------|------------|
| P<br>u<br>b<br>M<br>e<br>d | <p>Animals: #1 OR #2</p> <p>#1 Filters</p> <p>("animal experimentation"[MeSH Terms] OR "models, animal"[MeSH Terms] OR "invertebrates"[MeSH Terms] OR "Animals"[Mesh:noexp] OR "animal population groups"[MeSH Terms] OR "chordata"[MeSH Terms:noexp] OR "chordata, nonvertebrate"[MeSH Terms] OR "vertebrates"[MeSH Terms:noexp] OR "amphibians"[MeSH Terms] OR "birds"[MeSH Terms] OR "fishes"[MeSH Terms] OR "reptiles"[MeSH Terms] OR "mammals"[MeSH Terms:noexp] OR "primates"[MeSH Terms:noexp] OR "artiodactyla"[MeSH Terms] OR "carnivora"[MeSH Terms] OR "cetacea"[MeSH Terms] OR "chiroptera"[MeSH Terms] OR "elephants"[MeSH Terms] OR "hyraxes"[MeSH Terms] OR "insectivora"[MeSH Terms] OR "lagomorpha"[MeSH Terms] OR "marsupialia"[MeSH Terms] OR "monotremata"[MeSH Terms] OR "perissodactyla"[MeSH Terms] OR "rodentia"[MeSH Terms] OR "scandentia"[MeSH Terms] OR "sirenia"[MeSH Terms] OR "xenarthra"[MeSH Terms] OR "haplorhini"[MeSH Terms:noexp] OR "strepsirhini"[MeSH Terms] OR "platyrrhini"[MeSH Terms] OR "tarsii"[MeSH Terms] OR "catarrhini"[MeSH Terms:noexp] OR "cercopithecidae"[MeSH Terms] OR "hylobatidae"[MeSH Terms] OR "hominidae"[MeSH Terms:noexp] OR "gorilla gorilla"[MeSH Terms] OR "pan paniscus"[MeSH Terms] OR "pan troglodytes"[MeSH Terms] OR "pongo pygmaeus"[MeSH Terms])</p> <p>#2 Filters</p> <p>((animals[tiab] OR animal[tiab] OR mice[tiab] OR mus[tiab] OR mouse[tiab] OR murine[tiab] OR woodmouse[tiab] OR rats[tiab] OR rat[tiab] OR murinae[tiab] OR muridae[tiab] OR cottonrat[tiab] OR cottonrats[tiab] OR hamster[tiab] OR hamsters[tiab] OR cricetinae[tiab] OR rodentia[tiab] OR rodent[tiab] OR rodents[tiab] OR pigs[tiab] OR pig[tiab] OR swine[tiab] OR swines[tiab] OR piglets[tiab] OR piglet[tiab] OR boar[tiab] OR boars[tiab] OR "sus scrofa"[tiab] OR ferrets[tiab] OR ferret[tiab] OR polecat[tiab] OR polecats[tiab] OR "mustela putorius"[tiab] OR "guinea pigs"[tiab] OR "guinea pig"[tiab] OR cavia[tiab] OR callithrix[tiab] OR marmoset[tiab] OR marmosets[tiab] OR cebuella[tiab] OR hapale[tiab] OR octodon[tiab] OR chinchilla[tiab] OR chinchillas[tiab] OR gerbillinae[tiab] OR gerbil[tiab] OR gerbils[tiab] OR jird[tiab] OR jirds[tiab] OR merione[tiab] OR meriones[tiab] OR rabbits[tiab] OR rabbit[tiab] OR hares[tiab] OR hare[tiab] OR diptera[tiab] OR flies[tiab] OR fly[tiab] OR dipteral[tiab] OR drosophila[tiab] OR drosophilidae[tiab] OR cats[tiab] OR cat[tiab] OR carus[tiab] OR felis[tiab] OR nematoda[tiab] OR nematode[tiab] OR nematoda[tiab] OR nematode[tiab] OR nematodes[tiab] OR sipunculida[tiab] OR dogs[tiab] OR dog[tiab] OR canine[tiab] OR canines[tiab] OR canis[tiab] OR sheep[tiab] OR sheeps[tiab] OR mouflon[tiab] OR mouflons[tiab] OR ovis[tiab] OR goats[tiab] OR goat[tiab] OR capra[tiab] OR capras[tiab] OR rupicapra[tiab] OR chamois[tiab] OR haplorhini[tiab] OR monkey[tiab] OR monkeys[tiab] OR anthropoidea[tiab] OR anthropoids[tiab] OR saguinus[tiab] OR tamarin[tiab] OR tamarins[tiab] OR leontopithecus[tiab] OR hominidae[tiab] OR ape[tiab] OR apes[tiab] OR pan[tiab] OR paniscus[tiab] OR "pan paniscus"[tiab] OR bonobo[tiab] OR bonobos[tiab] OR troglodytes[tiab] OR "pan troglodytes"[tiab] OR gibbon[tiab] OR gibbons[tiab] OR siamang[tiab] OR siamangs[tiab] OR nomascus[tiab] OR symphalangus[tiab] OR chimpanzee[tiab] OR chimpanzees[tiab] OR prosimians[tiab] OR "bush baby"[tiab] OR prosimian[tiab] OR bush babies[tiab] OR galagos[tiab] OR galago[tiab] OR pongidae[tiab] OR gorilla[tiab] OR gorillas[tiab] OR pongo[tiab] OR pygmaeus[tiab] OR "pongo pygmaeus"[tiab] OR orangutans[tiab] OR pygmaeus[tiab] OR lemur[tiab] OR lemurs[tiab] OR lemuriidae[tiab] OR horse[tiab] OR horses[tiab] OR pongo[tiab] OR equus[tiab] OR cow[tiab] OR calf[tiab] OR bull[tiab] OR chicken[tiab] OR chickens[tiab] OR gallus[tiab] OR quail[tiab] OR bird[tiab] OR birds[tiab] OR quails[tiab] OR poultry[tiab] OR poultries[tiab] OR fowl[tiab] OR fowls[tiab] OR reptile[tiab] OR reptilia[tiab] OR reptiles[tiab] OR snakes[tiab] OR snake[tiab] OR lizard[tiab] OR lizards[tiab] OR alligator[tiab] OR alligators[tiab] OR crocodile[tiab] OR crocodiles[tiab] OR turtle[tiab] OR turtles[tiab] OR amphibian[tiab] OR amphibians[tiab] OR amphibia[tiab] OR frog[tiab] OR frogs[tiab] OR bombina[tiab] OR salientia[tiab] OR toad[tiab] OR toads[tiab] OR "epidalea calamita"[tiab] OR salamander[tiab] OR salamanders[tiab] OR eel[tiab] OR eels[tiab] OR fish[tiab] OR fishes[tiab] OR pisces[tiab] OR catfish[tiab] OR catfishes[tiab] OR siluriformes[tiab] OR arius[tiab] OR heteropneustes[tiab] OR sheatfish[tiab] OR perch[tiab] OR perches[tiab] OR percidae[tiab] OR perca[tiab] OR trout[tiab] OR trouts[tiab] OR char[tiab] OR chars[tiab] OR salvelinus[tiab] OR "fathead minnow"[tiab] OR minnow[tiab] OR cyprinidae[tiab] OR carps[tiab] OR carp[tiab] OR zebrafish[tiab] OR zebrafishes[tiab] OR goldfish[tiab] OR goldfishes[tiab] OR guppy[tiab] OR guppies[tiab] OR chub[tiab] OR chubs[tiab] OR tinca[tiab] OR barbels[tiab] OR barbuis[tiab] OR pimephales[tiab] OR promelas[tiab] OR "poecilia reticulata"[tiab] OR mullet[tiab] OR mullets[tiab] OR seahorse[tiab] OR seahorses[tiab] OR mugil curema[tiab] OR atlantic cod[tiab] OR shark[tiab] OR sharks[tiab] OR catshark[tiab] OR anguilla[tiab] OR salmonid[tiab] OR salmonids[tiab] OR whitefish[tiab] OR whitefishes[tiab] OR salmon[tiab] OR salmons[tiab] OR sole[tiab] OR solea[tiab] OR "sea lamprey"[tiab] OR lamprey[tiab] OR lampreys[tiab] OR pumpkinseed[tiab] OR sunfish[tiab] OR sunfishes[tiab] OR tilapia[tiab] OR tilapias[tiab] OR turbot[tiab] OR turbots[tiab] OR flatfish[tiab] OR flatfishes[tiab] OR scuiridae[tiab] OR squirrel[tiab] OR squirrels[tiab] OR chipmunk[tiab] OR chipmunks[tiab] OR suslik[tiab] OR susliks[tiab] OR vole[tiab] OR voles[tiab] OR lemming[tiab] OR lemmings[tiab] OR muskrat[tiab] OR muskrats[tiab])</p> | 5866942     | 12:40:07 | 04/09/2015 |

|                            |                                                                                                                                                                                                                                                                                                                                                                                                                                                                                                                                                                                                                                                                                                                                                                                                                                                                                                                                                                                                                                                                                                                                                                                                     |                    |                 |                   |
|----------------------------|-----------------------------------------------------------------------------------------------------------------------------------------------------------------------------------------------------------------------------------------------------------------------------------------------------------------------------------------------------------------------------------------------------------------------------------------------------------------------------------------------------------------------------------------------------------------------------------------------------------------------------------------------------------------------------------------------------------------------------------------------------------------------------------------------------------------------------------------------------------------------------------------------------------------------------------------------------------------------------------------------------------------------------------------------------------------------------------------------------------------------------------------------------------------------------------------------------|--------------------|-----------------|-------------------|
|                            | OR lemmus[Tiab] OR otter[Tiab] OR otters[Tiab] OR marten[Tiab] OR martens[Tiab] OR martes[Tiab] OR weasel[Tiab] OR badger[Tiab] OR badgers[Tiab] OR ermine[Tiab] OR mink[Tiab] OR minks[Tiab] OR sable[Tiab] OR sables[Tiab] OR gulo[Tiab] OR gulos[Tiab] OR wolverine[Tiab] OR wolverines[Tiab] OR minks[Tiab] OR mustela[Tiab] OR llama[Tiab] OR llamas[Tiab] OR alpaca[Tiab] OR alpacas[Tiab] OR camelid[Tiab] OR camelids[Tiab] OR guanaco[Tiab] OR guanacos[Tiab] OR chiroptera[Tiab] OR chiropteras[Tiab] OR bat[Tiab] OR bats[Tiab] OR fox[Tiab] OR foxes[Tiab] OR iguana[Tiab] OR iguanas[Tiab] OR xenopus laevis[Tiab] OR parakeet[Tiab] OR parakeets[Tiab] OR parrot[Tiab] OR parrots[Tiab] OR donkey[Tiab] OR donkeys[Tiab] OR mule[Tiab] OR mules[Tiab] OR zebra[Tiab] OR zebras[Tiab] OR shrew[Tiab] OR shrews[Tiab] OR bison[Tiab] OR bisons[Tiab] OR buffalo[Tiab] OR buffaloes[Tiab] OR deer[Tiab] OR deers[Tiab] OR bear[Tiab] OR bears[Tiab] OR panda[Tiab] OR pandas[Tiab] OR "wild hog"[Tiab] OR "wild boar"[Tiab] OR fitchew[Tiab] OR fitch[Tiab] OR beaver[Tiab] OR beavers[Tiab] OR jerboa[Tiab] OR jerboas[Tiab] OR capybara[Tiab] OR capybaras[Tiab]) NOT medline[subset]) |                    |                 |                   |
|                            | Plants: #3<br><br>#3 Filters<br><br>("Plants, Medicinal"[MeSH Terms] OR "Plant Extracts"[MeSH Terms] OR "Phytotherapy"[MeSH Terms] OR "Herbal Therapy"[TIAB] OR "Herb Therapy"[TIAB] OR "Drugs, Chinese Herbal"[MeSH Terms] OR "Chinese Plant Extracts"[TIAB] OR "Herbal Drug"[TIAB] OR "Herbal extract"[TIAB] OR "Plant Preparations"[MeSH Terms] OR "Herbal Preparation"[TIAB] OR "Plant Bark"[MeSH Terms] OR "plant leaves"[MeSH Terms] OR "plant leaf"[TIAB] OR "seeds extract"[TIAB] OR "bark extract"[TIAB] OR "leaves extract"[TIAB] OR "root extract"[TIAB] OR "fruits extract"[TIAB] OR "flowers Extract"[TIAB] OR "Plant Oils"[MeSH Terms] OR "Vegetable Oils"[TIAB])                                                                                                                                                                                                                                                                                                                                                                                                                                                                                                                     | 238064             | 12:37:50        | 04/09/2015        |
|                            | Wound #4<br><br>#4 Filters<br><br>("Wound Healing"[MeSH terms] OR "Regeneration"[MeSH terms])                                                                                                                                                                                                                                                                                                                                                                                                                                                                                                                                                                                                                                                                                                                                                                                                                                                                                                                                                                                                                                                                                                       | 174687             | 12:38:41        | 04/09/2015        |
|                            | Skin #5<br><br>#5 Filters<br><br>("Skin"[MeSH terms] OR "Dermis"[MeSH terms] OR "Granulation Tissue"[MeSH terms] OR "Epidermis"[MeSH terms] OR "Keratinocytes"[MeSH terms] OR "Integumentary System"[MeSH terms] OR "Dermatology"[MeSH terms] OR "Dermoscopy"[MeSH terms] OR "Wounds and Injuries"[MeSH terms] OR "Fibrosis"[MeSH terms] OR "Skin injuries"[TIAB] OR "Skin fibrosis"[TIAB] OR "Skin scars"[TIAB] OR "Skin cicatriz"[TIAB] OR "Cicatrix"[MeSH terms])                                                                                                                                                                                                                                                                                                                                                                                                                                                                                                                                                                                                                                                                                                                                | 1008716            | 12:38:56        | 04/09/2015        |
|                            | <b>Total: #1OR#2 and #3 and #4 and #5</b>                                                                                                                                                                                                                                                                                                                                                                                                                                                                                                                                                                                                                                                                                                                                                                                                                                                                                                                                                                                                                                                                                                                                                           | <b>476</b>         | <b>12:40:50</b> | <b>04/09/2015</b> |
| <b>Data base</b>           | <b>Descriptors</b>                                                                                                                                                                                                                                                                                                                                                                                                                                                                                                                                                                                                                                                                                                                                                                                                                                                                                                                                                                                                                                                                                                                                                                                  | <b>Items Found</b> | <b>Time</b>     | <b>Date</b>       |
| S<br>c<br>o<br>p<br>u<br>s | Plants: #1<br><br>#1 Filters<br><br>(TITLE-ABS-KEY("Plants, Medicinal") OR TITLE-ABS-KEY("Plant Extracts") OR TITLE-ABS-KEY("Phytotherapy") OR TITLE-ABS-KEY("Herbal Therapy") OR TITLE-ABS-KEY("Herb Therapy") OR TITLE-ABS-KEY("Drugs, Chinese Herbal") OR TITLE-ABS-KEY("Chinese Plant Extracts") OR TITLE-ABS-KEY("Herbal Drug") OR TITLE-ABS-KEY("Herbal extract") OR TITLE-ABS-KEY("Plant Preparations") OR TITLE-ABS-KEY("Herbal Preparation") OR TITLE-ABS-KEY("Plant Bark") OR TITLE-ABS-KEY("plant leaves") OR TITLE-ABS-KEY("plant leaf") OR TITLE-ABS-KEY("seeds extract") OR TITLE-ABS-KEY("bark extract") OR TITLE-ABS-KEY("leaves extract") OR TITLE-ABS-KEY("root extract") OR TITLE-ABS-KEY("fruits extract") OR TITLE-ABS-KEY("flowers Extract") OR TITLE-ABS-KEY("Plant Oils") OR TITLE-ABS-KEY("Vegetable Oils"))                                                                                                                                                                                                                                                                                                                                                               | 273.736            | 14:18:34        | 04/09/2015        |
|                            | Wound: #2<br><br>#2 Filters<br><br>(TITLE-ABS-KEY("Wound Healing") OR TITLE-ABS-KEY(Regeneration) OR TITLE-ABS-KEY(repair))                                                                                                                                                                                                                                                                                                                                                                                                                                                                                                                                                                                                                                                                                                                                                                                                                                                                                                                                                                                                                                                                         | 686.423            | 14:27:33        | 04/09/2015        |

|  |                                                                                                                                                                                                                                                                                                                                                                                                                                            |               |                 |                   |
|--|--------------------------------------------------------------------------------------------------------------------------------------------------------------------------------------------------------------------------------------------------------------------------------------------------------------------------------------------------------------------------------------------------------------------------------------------|---------------|-----------------|-------------------|
|  | <p>Skin: #3</p> <p>#3 Filters</p> <p>(TITLE-ABS-KEY(Skin) OR TITLE-ABS-KEY(Dermis) OR TITLE-ABS-KEY("Granulation Tissue") OR TITLE-ABS-KEY(Epidermis) OR TITLE-ABS-KEY(Keratinocyte*) OR TITLE-ABS-KEY(Integumentary System) OR TITLE-ABS-KEY(Dermatology) OR TITLE-ABS-KEY(Dermoscopy) OR TITLE-ABS-KEY(Skin wounds) OR TITLE-ABS-KEY(Skin injuries) OR TITLE-ABS-KEY(Skin fibrosis) OR TITLE-ABS-KEY(Skin scar*) OR (Skin cicatrix))</p> | 1.057.57<br>2 | 14:44:23        | 04/09/2015        |
|  | <p>Animals: #4</p> <p>#4 Filters</p> <p>Scopus gives us the option to limit the Experimental Animal research on keywords</p>                                                                                                                                                                                                                                                                                                               |               |                 |                   |
|  | <p><b>Total: #1 and #2 and #3 and #4</b></p>                                                                                                                                                                                                                                                                                                                                                                                               | <b>531</b>    | <b>15:05:23</b> | <b>04/09/2015</b> |





**Table S2. (Continued)**

| References                                                                                                                    | Bastos, et al., 2011 | Shukla, et al., 1999 | Muralidhar, et al., 2011 | Süntar, et al., 2013 | Mekonnen, et al., 2013 | Pieters, et al., 1995 | Korkina, et al., 2007 | Bigoniya, et al., 2013 | Lodhi, et al., 2011 | Tabandeh, et al., 2013 | Sonmez, et al., 2015 | Karakaş, et al., 2012 | Choi, et al., 2001 | Parente, et al., 2011 | Olugbuyiro, et al., 2010 | Süntar, et al., 2010 | Kim, et al., 2013 | Chaudhari, et al., 2006 | Swamy, et al., 2006 | Hernandes, et al., 2010 | Sidhu, et al., 1999 | Paramesha, et al., 2015 | Nagappan, et al., 2012 | Qu, et al., 2013 | Ghosh, et al., 2012 | Mukherjee, et al., 2013 | Melo, et al., 2011 | Ahamed, et al., 2008 | Zyuz'kov, et al., 2012 | Singh, et al., 2005 | Sharath, et al., 2010 | Vidya, et al., 2012 |   |   |        |        |      |
|-------------------------------------------------------------------------------------------------------------------------------|----------------------|----------------------|--------------------------|----------------------|------------------------|-----------------------|-----------------------|------------------------|---------------------|------------------------|----------------------|-----------------------|--------------------|-----------------------|--------------------------|----------------------|-------------------|-------------------------|---------------------|-------------------------|---------------------|-------------------------|------------------------|------------------|---------------------|-------------------------|--------------------|----------------------|------------------------|---------------------|-----------------------|---------------------|---|---|--------|--------|------|
| <b>Results</b>                                                                                                                |                      |                      |                          |                      |                        |                       |                       |                        |                     |                        |                      |                       |                    |                       |                          |                      |                   |                         |                     |                         |                     |                         |                        |                  |                     |                         |                    |                      |                        |                     |                       |                     |   |   |        |        |      |
| <b>Baseline data</b>                                                                                                          |                      |                      |                          |                      |                        |                       |                       |                        |                     |                        |                      |                       |                    |                       |                          |                      |                   |                         |                     |                         |                     |                         |                        |                  |                     |                         |                    |                      |                        |                     |                       |                     |   |   |        |        |      |
| Description of the animals health status of animals, for each experimental grup, before treatment                             |                      |                      |                          |                      |                        |                       |                       |                        |                     |                        |                      |                       |                    |                       |                          |                      |                   |                         |                     |                         |                     |                         |                        |                  |                     |                         |                    |                      |                        |                     |                       |                     |   |   |        | 0.0%   |      |
| <b>Number analysed</b>                                                                                                        |                      |                      |                          |                      |                        |                       |                       |                        |                     |                        |                      |                       |                    |                       |                          |                      |                   |                         |                     |                         |                     |                         |                        |                  |                     |                         |                    |                      |                        |                     |                       |                     |   |   |        |        |      |
| Number or animals in each group included in each analysis (absolute numbers)                                                  | ✓                    | □                    | ✓                        | ✓                    | ✓                      | ✓                     | ✓                     | ✓                      | ✓                   | ✓                      | ✓                    | ✓                     | ✓                  | ✓                     | ✓                        | ✓                    | ✓                 | ✓                       | ✓                   | ✓                       | □                   | ✓                       | ✓                      | ✓                | ✓                   | □                       | □                  | ✓                    | □                      | ✓                   | ✓                     | ✓                   | ✓ | ✓ | 84.37% |        |      |
| Animals or data not included in the analysis (and explanation for the exclusion)                                              |                      |                      |                          |                      |                        |                       |                       |                        |                     |                        |                      |                       |                    |                       |                          |                      |                   |                         |                     |                         |                     |                         |                        |                  |                     |                         |                    |                      |                        |                     |                       |                     |   |   |        | 0.0%   |      |
| <b>Outcomes and estimation</b>                                                                                                |                      |                      |                          |                      |                        |                       |                       |                        |                     |                        |                      |                       |                    |                       |                          |                      |                   |                         |                     |                         |                     |                         |                        |                  |                     |                         |                    |                      |                        |                     |                       |                     |   |   |        |        |      |
| Information (Mean= Standard Deviation)                                                                                        | □                    | ✓                    | ✓                        | ✓                    |                        | □                     | ✓                     | □                      | □                   | ✓                      | ✓                    | ✓                     | ✓                  | ✓                     | ✓                        | ✓                    | ✓                 | ✓                       | □                   | ✓                       | ✓                   | □                       | ✓                      | ✓                | ✓                   | ✓                       | □                  |                      | ✓                      |                     | ✓                     | ✓                   | ✓ |   | 68.75% |        |      |
| <b>Adverse events</b>                                                                                                         |                      |                      |                          |                      |                        |                       |                       |                        |                     |                        |                      |                       |                    |                       |                          |                      |                   |                         |                     |                         |                     |                         |                        |                  |                     |                         |                    |                      |                        |                     |                       |                     |   |   |        |        |      |
| Information on mortality of experimental animals (Mean=Standard Deviation)                                                    |                      |                      |                          |                      |                        |                       |                       |                        |                     |                        |                      |                       |                    |                       |                          |                      |                   |                         |                     |                         |                     |                         |                        |                  |                     |                         |                    |                      |                        |                     |                       |                     |   |   |        |        | 0.0% |
| Modifications to the experimental protocols made to reduce adverse events                                                     |                      |                      |                          |                      |                        |                       |                       |                        |                     |                        |                      |                       |                    |                       |                          |                      |                   |                         |                     |                         |                     |                         |                        |                  |                     |                         |                    |                      |                        |                     |                       |                     |   |   |        |        | 0.0% |
| <b>Discussion</b>                                                                                                             |                      |                      |                          |                      |                        |                       |                       |                        |                     |                        |                      |                       |                    |                       |                          |                      |                   |                         |                     |                         |                     |                         |                        |                  |                     |                         |                    |                      |                        |                     |                       |                     |   |   |        |        |      |
| <b>Interpretation /scientific implications</b>                                                                                |                      |                      |                          |                      |                        |                       |                       |                        |                     |                        |                      |                       |                    |                       |                          |                      |                   |                         |                     |                         |                     |                         | □                      |                  |                     |                         |                    |                      |                        |                     |                       |                     |   |   |        |        |      |
| Interpretatio of the results, taking into account the study objectives and hypotheses,current theory and relevant studies     | □                    | ✓                    | ✓                        | ✓                    | ✓                      | ✓                     | □                     | ✓                      | ✓                   | ✓                      | □                    | □                     | □                  | ✓                     | ✓                        | □                    | ✓                 | ✓                       | ✓                   | □                       | □                   | ✓                       | ✓                      | ✓                | ✓                   | ✓                       | ✓                  | ✓                    | ✓                      | ✓                   | ✓                     | ✓                   | ✓ | ✓ | ✓      | 75.0%  |      |
| Comments on the study limitations (sources of bias, limitations of the animal model, imprecision associated with the results) |                      |                      |                          | □                    |                        |                       |                       |                        |                     |                        |                      |                       |                    |                       |                          |                      |                   |                         |                     |                         |                     |                         |                        |                  |                     | □                       |                    |                      |                        |                     |                       |                     |   |   |        |        | 0.0% |
| <b>Generalisability /translation</b>                                                                                          |                      |                      |                          |                      |                        |                       |                       |                        |                     |                        |                      |                       |                    |                       |                          |                      |                   |                         |                     |                         |                     |                         |                        |                  |                     |                         |                    |                      |                        |                     |                       |                     |   |   |        |        |      |
| Comments on how the findings are likely to translate to other species or systems, including relevance to human biology        |                      |                      |                          | □                    |                        |                       |                       |                        |                     |                        |                      |                       |                    |                       |                          |                      |                   |                         |                     |                         |                     |                         |                        | □                |                     | □                       |                    |                      |                        |                     |                       |                     |   |   |        |        | 0.0% |
| <b>Funding</b>                                                                                                                |                      |                      |                          |                      |                        |                       |                       |                        |                     |                        |                      |                       |                    |                       |                          |                      |                   |                         |                     |                         |                     |                         |                        |                  |                     |                         |                    |                      |                        |                     |                       |                     |   |   |        |        |      |
| List of funding sources and the role of the funder(s) in the studt                                                            | ✓                    | ✓                    | □                        | ✓                    | ✓                      | ✓                     | □                     | □                      | ✓                   | ✓                      | ✓                    | ✓                     | □                  | ✓                     | ✓                        | ✓                    | ✓                 | ✓                       | ✓                   | ✓                       | ✓                   | ✓                       | ✓                      | ✓                | ✓                   | ✓                       | ✓                  | ✓                    | ✓                      | □                   | ✓                     | ✓                   | ✓ | ✓ | ✓      | 81.25% |      |
| <b>Results</b>                                                                                                                | 20                   | 18                   | 21                       | 24                   | 19                     | 20                    | 23                    | 20                     | 22                  | 27                     | 17                   | 24                    | 17                 | 26                    | 22                       | 23                   | 21                | 25                      | 22                  | 18                      | 19                  | 19                      | 25                     | 23               | 25                  | 17                      | 21                 | 20                   | 16                     | 19                  | 24                    | 21                  |   |   |        |        |      |

✓ Means that the criteria have been met according to Arrive. The percentage was calculated considering the total number of studies that met the criteria included in the bias analysis.
